# Supplementary material for: Wind energy and insects: reviewing the state of knowledge and identifying potential interactions
Source: PeerJ journal article supplement (doi:10.7717/peerj.18153), 2024-10-14
Supplement: FileS1.docx [file FileS1.docx]

| Order | Max Surveyed Height (m) | Vision, Light & Color | Heat | Wind | Flight & Migration | Sound & Vibration | Other |
| --- | --- | --- | --- | --- | --- | --- | --- |
| 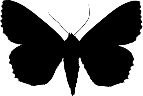Lepidoptera | Moths: 450  Butterflies: 1250 | Phototactic  May have preference for shorter light wavelengths (395, 418 nm) | Thermoregulate via basking | Some species utilize high winds for migration  May be able to use wind direction to orient flight | Several species migrate at high altitude over very long distances  Form migrating swarms  Locate mates via hilltopping  Synchronous flight muscles | Use airborne acoustic signals to detect and avoid predators  Anthropogenic noise may cause stress in larvae | Found in stomach of bats killed via turbine |
| 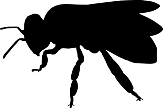Hymenoptera | >550 | Likely not attracted to red obstruction lighting.  Attraction to the color white.  Attraction to UV light | Bees may choose to forage on warmer inflorescence  Capable of warming via shivering | Some species capable of flying in high wind speeds | Asynchronous flight muscles  Honeybees form swarms to locate new nest sites  Locate makes via hilltopping | Honeybees use vibration to communicate  Parasitoids may use vibrations to detect hosts | Found in stomach of bats killed via turbine |
| 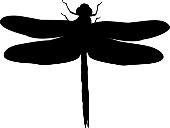Odonata | Dragonflies: 272  Damselflies: 57 | May prefer habitats with less shade  High visual acuity  Sensitive to polarized light  Coloration of individuals may influence competition  Use vision for hunting | Thermoregulate via basking | Some species use high winds for migration  Forage and interact in lower wind speeds | 18 NA species considered migratory. Most migrate at altitudes <100m  *Pantala flavescenes* migrates at high altitudes  Synchronous flight muscles  Locate mates via hilltopping | - | - |
| 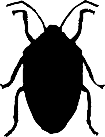Hemiptera | Leafhoppers: 922  Stink Bugs: 922 | May be attracted to yellow and red  Use vision for predator avoidance  May be attracted to white light  Phototactic | Triatomine bugs can perceive infrared radiation, among the most heat sensitive insects.  Leafhoppers showed attraction to solar heat-based traps  Thermoregulate via basking | Use wind for dispersal  Modify flight direction based on wind  Can cling to metal surfaces in high winds | Asynchronous flight muscles  Some species migrate | Use airborne acoustic signals  Substrate-borne noise may affect signaling  May be more abundant in high-noise areas | Found in stomach of bats killed via turbine |
| 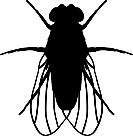Diptera | 507 | Showed significant attraction to white turbine mimics  Phototactic | Tabanids show strong attraction to heat  Thermoregulate via basking  Hematophagous species may be particularly heat sensitive | Use wind to disperse  Wind speed may affect oviposition sites | Asynchronous flight muscles  Form evening mating swarms  Locate mates via hilltopping  Noise may inhibit host-location | Use airborne acoustic signals  Noise may mask mating calls | Found in stomach of bats killed via turbine  Some species found basking on turbine towers |
| 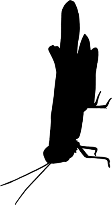Orthoptera | >400 | May prefer 540-570 nm wavelengths and vertical stripes  May be attracted to yellow | Thermoregulate via basking  Fly in warm temperatures | Use wind to disperse | Synchronous flight muscles  Many species form large swarms | Use airborne acoustic signals  Exposure to anthropogenic noise may hinder mate location, delay maturity, and reduce lifespan  Modify calls | Found in stomach of bats killed via turbine |
| 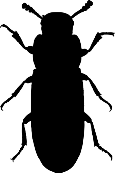Coleoptera | Ladybird: 1100 | Phototactic  May prefer shorter light wavelengths (395, 418 nm) and UV light | Some species may rely on floral heat rewards to reduce mating energy costs  Thermoregulate via basking  Some species have infrared sense organs | Wind may affect dispersal and oviposition sites  Use wind to orient to olfactory stimuli | Some species migrate at high altitudes  Asynchronous flight muscles  Locate mates via hilltopping | Can influence reproductive success and brood size  Use airborne acoustic signals  May be more abundant in high-noise areas | Found in stomach of bats killed via turbine  Some species found overwintering on turbine towers |
| 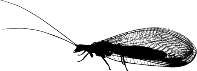Neuroptera | >550 | May have preference for cool, white light (440, 580nm) | Heat stress harmful to larvae | May respond differently to wind depending on habitat | Synchronous flight muscles | Use airborne acoustic signals  Use substrate-borne vibrations to locate prey | Found in stomach of bats killed via turbine |
| 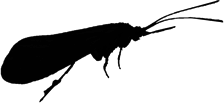Trichoptera | 300 | Low upper thermal tolerance  May have greater attraction to artificial light near water | Some have seasonal changes in upper thermal limits | May use wind to disperse | May fly at forest canopy level to disperse | May be more abundant with increased low-frequency noise | Found in stomach of bats killed via turbine |
|  |  |  |  |  |  |  |  |
| 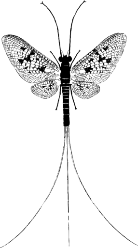Ephemeroptera | 300 | May have greater attraction to artificial light near water | Some have seasonal changes in upper thermal limits | May use wind to disperse | Form large mating swarms | - | Found in stomach of bats killed via turbine |
| 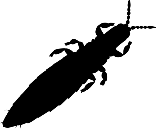Thysanoptera | >550 | Evidence for and against attraction to artificial light  May show avoidance to red light  Phototactic  May prefer areas with high UV light | Some can adapt to cold and hot conditions | Likely dispersed by wind | Asynchronous flight muscles  May form swarms | - | - |
| 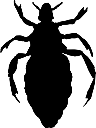Psocodea | >550 | Attraction to UV and green wavelengths | Hematophagous species may be particularly heat sensitive | - | Wings often absent or reduced | - | Found in stomach of bats killed via turbine |

**Families of note: Noctuidae (Lepidoptera), Nymphalidae (Lepiodptera), Alydidae (Hempitera), Coccinellidae (Coleoptera)**

**References:**

## Alcock J. 1989. The mating system of Mydas ventralis (Diptera: Mydidae). Psyche 96:167-176. 10.1155/1989/36084

## Antolinez CA, Martini X, Stelinski LL, and Rivera MJ. 2022. Wind Speed and Direction Drive Assisted Dispersal of Asian Citrus Psyllid. Environmental Entomology 51:305-312. 10.1093/ee/nvab140

## Arce AP, Horren T, Schletterer M, and Kail J. 2021. How far can EPTs fly? A comparison of empirical flying distances of riverine invertebrates and existing dispersal metrics. Ecological Indicators 125. 10.1016/j.ecolind.2021.107465

## Bozdogan H. 2020. Species richness and composition of Neuroptera in the forests fregments of the Taurus Mountains Range, Turkey. Saudi Journal of Biological Sciences 27:1201-1207. 10.1016/j.sjbs.2020.02.018

## Bruce-White C, Shardlow M, Buglife, and Staff B. 2011. A Review of the Impact of Artificial Light on Invertebrates: Buglife The Invertebrate Conservation Trust.

## Cambridge JE, Francoeur L, and Hamilton GC. 2017. Brown marmorated stink bug (Hemiptera: Pentatomidae) attraction to various light stimuli. Florida Entomologist 100:583-588. 10.1653/024.100.0315

## Chen Z, Liu X, Zhou JX, Dou H, and Kuang RP. 2014. Phototactic behaviour of Pachyneuron aphidis (Hymenoptera: Pteromalidae) - hyperparasitoid of Myzus persicae (Hemiptera: Aphidiae). Biocontrol Science and Technology 24:1469-1480. 10.1080/09583157.2014.945901

## Davis AK, Schroeder H, Yeager I, and Pearce J. 2018. Effects of simulated highway noise on heart rates of larval monarch butterflies, <i>Danaus plexippus</i>: implications for roadside habitat suitability. Biology Letters 14:20180018. 10.1098/rsbl.2018.0018

## Djemai I, Casas J, and Magal C. 2004. Parasitoid foraging decisions mediated by artificial vibrations. Animal Behaviour 67:567-571. 10.1016/j.anbehav.2003.07.006

## Farnier K, Dyer AG, and Steinbauer MJ. 2014. Related but not alike: not all Hemiptera are attracted to yellow. Frontiers in Ecology and Evolution 2. 10.3389/fevo.2014.00067

## Feng H-Q, Wu K-M, Ni Y-X, Cheng D-F, and Guo Y-Y. 2006. Nocturnal migration of dragonflies over the Bohai Sea in northern China. Ecological Entomology 31:511-520. 10.1111/j.1365-2311.2006.00813.x

## Fertin A, and Casas Jrm. 2007. Orientation towards prey in antlions: efficient use of wave propagation in sand. Journal of Experimental Biology 210:3337-3343. 10.1242/jeb.004473

## Ghosh A, Jagdale SS, Basavaraj, Dietzgen RG, and Jain RK. 2020. Genetics of Thrips palmi (Thysanoptera: Thripidae). Journal of Pest Science 93:27-39. 10.1007/s10340-019-01160-2

## Gibo DL. 1981. Altitudes attained by migrating monarch butterflies, Danaus p. plexippus (Lepidoptera: Danaidae), as reported by glider pilots. Canadian Journal of Zoology 59:571-572. 10.1139/z81-084

## Gingl E, and Tichy H. 2001. Infrared sensitivity of thermoreceptors. Journal of comparative physiology A 187:467-475. 10.1007/s003590100221

## Gomes DGE, Toth CA, Bateman CC, Francis CD, Kawahara AY, and Barber JR. 2021. Experimental river noise alters arthropod abundance. Oikos 130:2001-2014. 10.1111/oik.08499

## Goulson D, Sangster EL, and Young JC. 2011. Evidence for hilltopping in bumblebees? Ecological Entomology 36:560-563. https://doi.org/10.1111/j.1365-2311.2011.01297.x

## Guillermo-Ferreira R, Bispo PC, Appel E, Kovalev A, and Gorb SN. 2019. Structural coloration predicts the outcome of male contests in the Amazonian damselfly Chalcopteryx scintillans (Odonata: Polythoridae). Arthropod Structure & Development 53. 10.1016/j.asd.2019.100884

## Gurule-Small G, and Tinghitella R. 2019. Life history consequences of developing in anthropogenic noise. Global Change Biology 25. 10.1111/gcb.14610

## Gurule-Small GA, and Tinghitella RM. 2018. Developmental experience with anthropogenic noise hinders adult mate location in an acoustically signalling invertebrate. Biology Letters 14:20170714. 10.1098/rsbl.2017.0714

## Hedlund JSU, Lv H, Lehmann P, Hu G, Anderson RC, and Chapman JW. 2021. Unraveling the World's Longest Non-stop Migration: The Indian Ocean Crossing of the Globe Skimmer Dragonfly. Frontiers in Ecology and Evolution 9. 10.3389/fevo.2021.698128

## Heinrich B. 1974. Thermoregulation in Endothermic Insects. Science 185:747-756. 10.1126/science.185.4153.747

## Helms J, Godfrey A, Ames T, and Bridge E. 2016. Predator foraging altitudes reveal the structure of aerial insect communities. Scientific Reports 6:28670. 10.1038/srep28670

## Horvath G, Malik P, Kriska G, and Wildermuth H. 2007. Ecological traps for dragonflies in a cemetery: the attraction of Sympetrum species (Odonata : Libellulidae) by horizontally polarizing black gravestones. Freshwater Biology 52:1700-1709. 10.1111/j.1365-2427.2007.01798.x

## Jeffries DL, Chapman J, Roy HE, Humphries S, Harrington R, Brown PMJ, and Handley L-JL. 2013. Characteristics and Drivers of High-Altitude Ladybird Flight: Insights from Vertical-Looking Entomological Radar. Plos One 8:e82278. 10.1371/journal.pone.0082278

## Klueken AM, Hau B, Ulber B, and Poehling HM. 2009. Forecasting migration of cereal aphids (Hemiptera: Aphididae) in autumn and spring. Journal of Applied Entomology 133:328-344. 10.1111/j.1439-0418.2009.01387.x

## Lazzari CR. 2009. Chapter 1 Orientation Towards Hosts in Haematophagous Insects: An Integrative Perspective. Advances in Insect Physiology: Academic Press, 1-58.

## Lecoq M, and Pierozzi I. 1996. Flight behaviour of Rhammatocerus schistocercoides (Rehn, 1906) swarms in the state of Mato Grosso in Brazil (Orthoptera: Acrididae, Gomphocerinae). Annales De La Societe Entomologique De France. p 265-283.

## Liu DZ, Zhao SY, Yang XM, Wang R, Cang XZ, Zhang HW, Hu C, Wyckhuys KAG, and Wu KM. 2021. Radar monitoring unveils migration dynamics of the yellow-spined bamboo locust (Orthoptera: Arcypteridae). Computers and Electronics in Agriculture 187. 10.1016/j.compag.2021.106306

## Martini X, Rivera M, Hoyte A, Setamou M, and Stelinski L. 2018. Effects of Wind, Temperature, and Barometric Pressure on Asian Citrus Psyllid (Hemiptera: Liviidae) flight behavior. Journal of Economic Entomology 111:2570-2577. 10.1093/jee/toy241

## Mason NA. 2017. Effects of wind, ambient temperature and sun position on damselfly flight activity and perch orientation. Animal Behaviour 124:175-181. 10.1016/j.anbehav.2016.12.025

## Mendez A, Martin L, Arines J, Carballeira R, and Sanmartin P. 2022. Attraction of Insects to Ornamental Lighting Used on Cultural Heritage Buildings: A Case Study in an Urban Area. Insects 13. 10.3390/insects13121153

## Miler K, and Czarnoleski M. 2021. Heat stress during development makes antlion larvae more responsive to vibrational cues. Current Zoology 68:345-350. 10.1093/cz/zoab098

## Murata M, Hariyama T, Yamahama Y, Toyama M, and Ohta I. 2018. In the presence of red light, cucumber and possibly other host plants lose their attractability to the melon thrips Thrips palmi (Thysanoptera: Thripidae). Applied Entomology and Zoology 53:117-128. 10.1007/s13355-017-0537-5

## Nabli H, Bailey WC, and Necibi S. 1999. Beneficial Insect Attraction to Light Traps with Different Wavelengths. Biological Control 16:185-188. 10.1006/bcon.1999.0748

## Nguyen THN, Borgemeister C, Max J, and Poehling HM. 2009. Manipulation of Ultraviolet Light Affects Immigration Behavior of Ceratothripoides claratris (Thysanoptera: Thripidae). Journal of Economic Entomology 102:1559-1566. 10.1603/029.102.0421

## Perkin EK, Holker F, and Tockner K. 2014. The effects of artificial lighting on adult aquatic and terrestrial insects. Freshwater Biology 59:368-377. 10.1111/fwb.12270

## Rands SA, and Whitney HM. 2008. Floral Temperature and Optimal Foraging: Is Heat a Feasible Floral Reward for Pollinators? Plos One 3:e2007. 10.1371/journal.pone.0002007

## Remsburg AJ, Olson AC, and Samways MJ. 2008. Shade alone reduces adult dragonfly (Odonata : Libellulidae) abundance. Journal of Insect Behavior 21:460-468. 10.1007/s10905-008-9138-z

## Russell R, May M, Soltesz K, and Fitzpatrick J. 2009. Massive Swarm Migrations of Dragonflies (Odonata) in Eastern North America. The American Midland Naturalist 140:325-342. 10.1674/0003-0031(1998)140[0325:MSMODO]2.0.CO;2

## Salom SM, and McLean JA. 1991. Flight behavior of Scolytid beetle in response to semiochemicals at different wind speeds. Journal of Chemical Ecology 17:647-661. 10.1007/bf00982133

## Samarra F, Klappert K, Brumm H, and Miller P. 2009. Background noise constrains communication: acoustic masking of courtship song in the fruit fly Drosophila montana. Behaviour 146:1635-1648. 10.1163/156853909X463713

## Seymour RS, White CR, and Gibernau M. 2003. Heat reward for insect pollinators. Nature 426:243-244. 10.1038/426243a

## Takano S, and Takasu K. 2016. Ability of Megacopta cribraria (Hemiptera: Plataspidae) to Cling to Different Surfaces against Extreme Wind. Journal of Insect Behavior 29:256-261. 10.1007/s10905-016-9557-1

## Valdez EW, and Cryan PM. 2013. Insect prey eaten by hoary bats (Lasiurus cinereus) prior to fatal collisions with wind turbines. Western North American Naturalist 73:516-524. 10.3398/064.073.0404

## Wakgari W. 1997. The effect of colouring and of water absorbing and retaining agents on acceptability of bran-based bait to the desert locust, Schistocerca gregaria (Forsk) (Orthoptera: Acrididae). International Journal of Pest Management 43:155-161. 10.1080/096708797228870

## Withers TM, and Harris MO. 1997. Influence of Wind on Hessian Fly (Diptera: Cecidomyiidae) Flight and Egglaying Behavior. Environmental Entomology 26:327-333. 10.1093/ee/26.2.327

## Yang JY, Sung BK, and Lee HS. 2015. Phototactic behavior 8: phototactic behavioral responses of western flower thrips, Frankliniella occidentalis Pergande (Thysanoptera: Thripidae), to light-emitting diodes. Journal of the Korean Society for Applied Biological Chemistry 58:359-363. 10.1007/s13765-015-0055-5

## Zermoglio PF, Latorre-Estivalis JM, Crespo JE, Lorenzo MG, and Lazzari CR. 2015. Thermosensation and the TRPV channel in Rhodnius prolixus. Journal of Insect Physiology 81:145-156. 10.1016/j.jinsphys.2015.07.014

## Zhou ZS, Zheng XW, Guo JY, and Wan FH. 2018. Relationship between host searching and wind direction in Ophraella communa (Coleoptera: Chrysomelidae). Florida Entomologist 101:536-539. 10.1653/024.101.0332
